1 **Title:** A Novel Propidium Monoazide-Based PCR Assay Can Measure Viable  
2 Uropathogenic *E. coli* *in Vitro* and *in Vivo*

3  
4  
5 **Authors:** Albert S Lee<sup>1†</sup>, Olivia K Lamanna<sup>2†</sup>, Kenji Ishida<sup>2</sup>, Elaise Hill<sup>3,4</sup>,  
6 Michael H. Hsieh<sup>1,2,3\*</sup>

7 †These authors are co-first authors

8 \*Corresponding author

9 <sup>1</sup> Division of Pediatric Urology, Children's National Hospital, Washington, DC 20010

10 <sup>2</sup> Sheikh Zayed Institute, Children's National Hospital, Washington, DC 20010

11 <sup>3</sup>School of Medicine and Health Sciences, The George Washington University,  
12 Washington, DC 20052

13 <sup>4</sup>Center for Cancer and Immunology Research, Children's National Hospital,  
14 Washington, DC 20010

15

16 **Running title:** PMA in mouse urine

17

18

19

20

21

22

23

24

25

26

27

28

29

30

31 **Corresponding author:**

32 Michael Hsieh, MD, PhD

33 [mhsieh@childrensnational.org](mailto:mhsieh@childrensnational.org)

34

35 **Abbreviations:**

36 CFU- Colony forming units

37 C<sub>T</sub>- Threshold Cycle

38 dC<sub>T</sub>- Delta Threshold Cycle

39 *E. coli*- *Escherichia coli*

40 LB- Luria-Bertani

41 OD- Optical Density

42 PBS- Phosphate-buffered saline

43 PMA- Propidium Monoazide

44 RT-PCR- Real-time polymerase chain reaction

45 UTI- Urinary Tract Infection

46

47  
48  
49  
50  
51  
52  
53  
54  
55  
56  
57  
58  
59  
60  
61  
62  
63  
64  
65  
66  
67  
68  
69  
70  
71  
72  
73  
74  
75  
76  
77  
78  
79  
80  
81  
82  
83  
84  
85  
86  
87  
88  
89  
90  
91  
92

## Abstract:

**Background:** Polymerase chain reaction (PCR) is an important means by which to study the urine microbiome and is emerging as possible alternative to urine cultures to identify pathogens that cause urinary tract infection (UTI). However, PCR is limited by its inability to differentiate DNA originating from viable, metabolically active versus non-viable, inactive bacteria. This drawback has led to concerns that urobiome studies and PCR-based diagnosis of UTI are confounded by the presence of relic DNA from non-viable bacteria in urine. Propidium monoazide (PMA) dye can penetrate cells with compromised cell membranes and covalently bind to DNA, rendering it inaccessible to amplification by PCR. Although PMA has been shown to differentiate between non-viable and viable bacteria in various settings, its effectiveness in urine has not been previously studied. We sought to investigate the ability of PMA to differentiate between viable and non-viable bacteria in urine.

**Methods:** Varying amounts of viable or non-viable uropathogenic *E. coli* (UTI89) or buffer control were titrated with mouse urine. The samples were centrifuged to collect urine sediment or not centrifuged. Urine samples were incubated with PMA and DNA cross-linked using blue LED light. DNA was isolated and uidA gene-specific PCR was performed. For *in vivo* studies, mice were inoculated with UTI89, followed by ciprofloxacin treatment or no treatment. After the completion of ciprofloxacin treatment, an aliquot of urine was plated on non-selective LB agar and another aliquot was treated with PMA and subjected to uidA-specific PCR.

**Results:** PMA's efficiency in excluding DNA signal from non-viable bacteria was significantly higher in bacterial samples in phosphate-buffered saline (PBS,  $dC_T=13.69$ ) versus bacterial samples in unspun urine ( $dC_T=1.58$ ). This discrepancy was diminished by spinning down urine-based bacterial samples to collect sediment and resuspending it in PBS prior to PMA treatment. In 3 of 5 replicate groups of UTI89-infected mice, no bacteria grew in culture; however, there was PCR amplification of *E. coli* after PMA treatment in 2 of those 3 groups.

**Conclusion:** We have successfully developed PMA-based PCR methods for amplifying DNA from live bacteria in urine. Our results suggest that non-PMA bound DNA from live bacteria can be present in urine, even after antibiotic treatment.

This indicates that viable but non-culturable *E. coli* can be present following treatment of UTI, and may explain why some patients have persistent symptoms but negative urine cultures following UTI treatment.

## Keywords:

Propidium Monoazide, Viability, Urine, Microbiome, Non-culturable bacteria, urobiome, urinary tract infection, relic DNA

93

## 94 INTRODUCTION

95

96 The existence of the urinary microbiome, the presence of bacterial communities within  
97 the urinary tract, is challenging the paradigm that this organ system is normally sterile  
98 (Siddiqui et al., 2012; Wolfe et al., 2012; Hilt et al., 2014; Brubaker and Wolfe, 2015;  
99 Thomas-White et al., 2016). Furthermore, several studies have shown an association  
100 between the urine microbiome and numerous urological diseases (Fouts et al., 2012;  
101 Siddiqui et al., 2012; Whiteside et al., 2015; Bajic et al., 2018; Bučević Popović et al.,  
102 2018; Magistro and Stief, 2019; Neugent et al., 2020). Therefore, it is imperative to  
103 accurately characterize the urinary microbiome as it may inform overall urinary tract  
104 health and aid in the diagnosis of urinary conditions, i.e., urinary tract infection (UTI)  
105 (Perez-Carrasco et al., 2021).

106

107 Numerous clinical studies of patients with UTI feature assessments of both  
108 microbiologic and clinical cure, which are based on negative urine cultures and  
109 resolution/improvement of symptoms, respectively (Raz et al., 2002; Wunderink et al.,  
110 2018; Miller et al., 2019). Some patients in these studies have featured discordance  
111 between microbiologic and clinical cure (Hilt et al., 2014; Price et al., 2018; Swamy et  
112 al., 2019). One possible interpretation of this discordance is that conventional urine  
113 cultures may be missing residual bacteria causing persistent symptoms following  
114 antibiotic therapy. An alternative to urine cultures for detection of urinary  
115 microorganisms is polymerase chain reaction (PCR). PCR identifies organisms through  
116 the amplification of DNA material present in urine and many studies on the urinary  
117 microbiome rely on this molecular approach (Lewis et al., 2013; Brubaker and Wolfe,  
118 2015; Ackerman et al., 2019). These methods do not discriminate between relic DNA  
119 (DNA from non-viable bacteria) versus DNA from viable bacteria. This is an important  
120 limitation of conventional PCR because the confounding effects of relic DNA have been  
121 reported in various microbiologic settings (Carini et al., 2016; Nagler et al., 2021; Ren et  
122 al., 2021). Viable, metabolically active bacteria presumably exert much more influence  
123 over the clinical course of UTI than dead bacteria. Thus, the amplification of total DNA  
124 without selection for DNA from viable bacteria may bias conventional PCR-derived  
125 results (Carini et al., 2016; Lennon et al., 2018). Given that relic DNA influences  
126 conventional molecular measurements of microbial abundance and diversity, we posit  
127 that a method to detect viable, metabolically active bacteria is needed for more accurate  
128 urobiome studies (Lennon et al., 2018).

129

130 A method of identifying metabolically active bacteria via PCR has been recently  
131 developed. Propidium monoazide (PMA) dye penetrates cells with compromised cell  
132 membranes (non-viable cells) and covalently binds to DNA, rendering it unable to be  
133 amplified by PCR (Deshmukh et al., 2020). PMA-based PCR has previously been  
134 shown to differentiate between non-viable and viable bacteria in many settings (Fittipaldi  
135 et al., 2010; Cattani et al., 2016; Gobert et al., 2018; Brauge et al., 2019; Lu et al.,  
136 2019). However, the efficiency of PMA in urine has not been previously investigated.  
137 Here we investigated the ability of PMA dye in urine to detect DNA derived from viable  
138 bacteria.

139

## 140 **MATERIALS AND METHODS**

### 141 *Bacteria Culture*

142 All bacteria work was performed under sterile conditions in a BSL-2 biosafety  
143 cabinet. Bacteria was prepared by previously reported methods (Hung, 2009). Briefly,  
144 glycerol stock containing the uropathogenic *Escherichia coli* strain UTI89 was used to  
145 inoculate a Miller Luria Broth (LB) agar plate (Sigma-Aldrich, St. Louis, MO). The plate  
146 was incubated for 24 hours at 37°C. A single colony was picked and transferred to 10  
147 mL LB broth. The culture was incubated overnight at 37°C in a stationary flask. Twenty-  
148 five microliters of the 10 mL culture were transferred to 25mL of LB broth. The culture  
149 was incubated again overnight at 37°C in a stationary flask. The culture was centrifuged  
150 at 5000 x g for 5 minutes at 4°C. The supernatant was decanted and the bacteria pellet  
151 was resuspended in 10 mL of sterile phosphate buffered saline (PBS) (Thermofisher  
152 Scientific, Waltham, MA). This suspension was diluted tenfold in sterile PBS. The optical  
153 density (OD) 600nm value was analyzed using the NanoDrop-1000 (Thermofisher  
154 Scientific, Waltham, MA) and the suspension diluted until the OD was 0.50,  
155 corresponding to 1-2x10<sup>7</sup> colony-forming units (CFU) per 50 µL.

### 156 *Mouse Urine Collection*

157 Mice were scruffed and held with their pelvises above sterile parafilm (Sigma-Aldrich,  
158 St. Louis, MO) until they voided. Urine was aspirated from the parafilm. New parafilm  
159 was used for each mouse. Urine was then placed on ice and immediately processed.

### 160 *Generation of non-viable bacteria*

161 Five hundred µL of *E. coli* with OD value 0.5 was mixed with isopropanol (Sigma-  
162 Aldrich, St. Louis, MO) to achieve a final concentration of 70% v/v. After 10 minutes, the  
163 mixture was centrifuged at 8000 x g for 10 min. The supernatant was removed and the  
164 pellet was resuspended in 100 µL of PBS. The suspensions of non-viable bacteria were  
165 plated on LB with agar plates and incubated at 37°C overnight to confirm successful  
166 killing.

### 167 *Urine dilution of bacteria*

168 Mouse urine was serially diluted to a ratio of 1:2, 1:4, 1:8, and 1:12 with PBS.  
169 Subsequently, 50 µL of all viable or all non-viable bacteria was added to 50 µL of the  
170 various titrations of urine, or undiluted urine. The samples were then either treated with  
171 PMA or left untreated.

### 172 *PMA treatment*

173 Under minimal light, PMAxx Dye (hereafter referred to as PMA) (Biotium, Fremont, CA)  
174 with a concentration of 20 mM was diluted with nuclease-free water (Sigma-Aldrich, St.  
175 Louis, MO) to a final concentration of 10 mM. It was then added to the bacterial mixture  
176 in a 1:100 ratio. Next, samples were incubated for 15 minutes in the dark with gentle

177 agitation. The samples were placed in an LED lightbox (Biotium, Fremont, CA) for 20  
178 minutes to induce PMA crosslinking of DNA. The supernatant was removed and the  
179 pellet was reconstituted with PBS to its original volume of 100  $\mu$ L.

#### 180 *DNA extraction and quantification*

181 DNA was isolated using the DNeasy PowerSoil Pro Kit (Qiagen, Germantown, MD)  
182 according to kit instructions, except that DNA was eluted from the column with 25  $\mu$ L of  
183 nuclease-free water. PCR was performed targeting the *E. coli uidA* gene with TaqMan  
184 polymerase (Invitrogen, Waltham, MA) according to previously described methods  
185 (Taskin et al., 2011). Delta  $C_T$  ( $dC_T$ ) values were calculated to quantify the differences  
186 between  $C_T$  values of PMA-treated and untreated samples.

#### 187 *Preparation of urea solution and PMA treatment*

188 Urea (Sigma-Aldrich, St. Louis, MO) was diluted with PBS in to two concentrations; 285  
189 mM, corresponding to the urine urea level in humans and 1800 mM, corresponding to  
190 the urine urea level in mice (Yang and Bankir, 2005). Fifty  $\mu$ L of 100% viable or 100%  
191 non-viable bacteria was added to 50  $\mu$ L of the urea solutions. The DNA of the PMA  
192 treated and untreated samples was extracted and amplified as described above.

#### 193 *Titration of viable and non-viable bacteria with urine to develop a standard curve*

194 Defined quantities of viable bacteria, isopropanol-killed non-viable bacteria, or PBS  
195 were mixed to a total volume of 100  $\mu$ L. With a fixed amount of viable bacteria, non-  
196 viable bacteria were added to achieve 1:10, 1:100 and 1:1000 non-viable to viable  
197 bacterial dilutions. In a similar manner, various amounts of viable bacteria were added  
198 to a fixed amount of non-viable bacteria to generate a standard curve. Undiluted viable  
199 and non-viable cultures were also used. Fifty  $\mu$ L of these bacterial solutions were added  
200 to urine. The mixture was then centrifuged at 5000xg, resuspended with 100  $\mu$ L of  
201 sterile PBS, treated with PMA, and the DNA was extracted as outlined above.

#### 202 *Bacterial inoculation via transurethral catheterization of mice*

203 All animal work was approved by The Institutional Animal Care and Use Committee of  
204 Children's National Hospital under Animal Use Protocol #00030764. Procedures were  
205 performed in an ethical fashion. Prior to use, all animals were acclimated for 7 days  
206 after arrival to the animal facility. 24-week-old female C3H/HeOuj mice (stock no:  
207 000635, The Jackson Laboratory, Bar Harbor, ME) were used in this study.

208 Mice were anesthetized using 2% isoflurane. Any urine in the bladder was expressed by  
209 gently pressing on the lower abdomen. A 24g x  $\frac{3}{4}$  inch angiocatheter (Clint  
210 Pharmaceuticals, Old Hickory, TN) was attached to a prepared 1 ml syringe containing  
211 the inoculant. The angiocath was lubricated (DynaLub Sterile Lubricating Jelly, Amazon,  
212 Seattle, WA) and transurethrally inserted into the bladder. 100  $\mu$ L of the inoculant was  
213 instilled slowly into the bladder and the angiocatheter kept inserted for 30 seconds to  
214 prevent leakage of the inoculant.

## 215 *Antibiotic treatment of mice*

216 Five days after inoculation, mice were intraperitoneally injected with 10 mg/kg  
217 ciprofloxacin twice a day. This regimen was selected as it recapitulates the human  
218 plasma peak levels achieved with the commonly used 500 mg oral dose, and has been  
219 shown previously to adequately treat UTI in mice (Guillard et al., 2013).

## 220 *Urine collection for in vivo studies*

221 One day after completion of ciprofloxacin treatment, mouse urine was collected on ice.  
222 Individual urine samples in the same treatment groups (3-4 mice/group) were pooled.  
223 The urine was either serially diluted and plated in triplicate on LB agar or prepared for  
224 PMA treatment. Fifty  $\mu$ L of PBS was added to the urine and the solution was centrifuged  
225 and treated with PMA as outlined above. DNA was extracted and the *E. coli uidA* gene  
226 was amplified as described above (Taskin et al., 2011).

## 227 **RESULTS**

228

### 229 *Urine interferes with PMA efficiency.*

230

231 Initial PMA-based PCR experiments using mouse urine yielded little differences in  
232 amplification of PMA-treated vs. untreated DNA samples. This led us to consider the  
233 possibility that urine was exerting a matrix effect which interferes with downstream  
234 molecular processes such as PMA crosslinking (Taylor et al., 2012). The  $dC_T$  value of  
235 PMA-treated vs. untreated samples that contained 100% non-viable bacteria  
236 resuspended in mouse urine was 1.58, which was about one tenth of the  $dC_T$  of the  
237 same sample resuspended in PBS (13.69, **Figure 1A**). When urine was diluted with  
238 PBS, the  $dC_T$ s of PMA-treated vs. untreated samples increased, indicating improved  
239 PMA efficiency (**Figure 1B**). However, the increase in  $dC_T$  plateaued at a dilution of  
240 1:8. These findings indicate that urine inhibits PMA activity.

241

### 242 *Urea does not affect PMA efficacy.*

243

244 Urea is the most abundant solute present in urine and is known to influence molecular  
245 structure and function (Yang and Bankir, 2005; Wei et al., 2010). Thus, we sought to  
246 investigate urea's potential effect on PMA's function in crosslinking DNA and  
247 subsequently inhibiting its amplification. We analyzed PMA's efficiency at two different  
248 urea concentrations: 280 mM and 1800 mM, the approximate concentration of urea in  
249 human and mouse urine, respectively. The  $dC_T$ s of PMA-treated vs. untreated samples  
250 with 100% nonviable bacteria suspended in either urea concentration was similar to that  
251 of the PBS control. Namely, the  $dC_T$  of the PBS, human urea concentration, and mouse  
252 urea concentration samples were 15.98, 16.42, and 15.43, respectively (**Figure 1C**).  
253 This suggests that urea does not cause urine's matrix effect on PMA efficiency.

254

### 255 *Resuspension of urine sediment with PBS restores PMA efficiency.*

256

257 We observed that for a solution with 100% nonviable bacteria, the  $C_T$  value increases  
258 when the urine supernatant is resuspended in PBS prior to PMA crosslinking compared  
259 to when PMA crosslinking is performed in unspun urine (**Figure 1D**). Furthermore, upon  
260 removal of the urine supernatant and subsequent resuspension in PBS, PMA treatment  
261 and downstream PCR was most efficient in differentiating viability when there was a  
262 greater proportion of nonviable cells in the solution. Across titrations of viable and non-  
263 viable bacteria where viable bacteria make up the majority of the solution,  $C_T$  values did  
264 not significantly differ, with all values close to 16. This suggests the amount of non-  
265 viable bacteria does not influence the detection of a fixed amount of viable bacteria.  
266 Conversely, when the majority of the cells are non-viable, the  $C_T$  values decrease as the  
267 amount of viable bacteria in the solution increases. For instance, the  $C_T$  is  
268 approximately 18 with 100% viable cells in solution and increases to ~ 27 when viable  
269 cells make up only 0.1% of the solution (**Figure 2B**).

270

271 *Detection of viable bacteria correlates with colony forming units (cfu)*

272

273 Given that the number of colony forming units present in urine cultures remains the  
274 mainstay of clinical diagnosis of UTI, we sought to determine whether urine cultures  
275 with various titrations of viable cells and a fixed amount of nonviable cells yielded cfu  
276 and  $C_T$  values that correlated with each other. Indeed, the correlation between cfu and  
277  $C_T$  values was strongly negative with an  $r^2$  of 0.955 (**Figure 3**).

278

279 *Detection of non-culturable but viable bacteria in mouse urine after antibiotic treatment.*

280

281 PCR-based detection of bacterial DNA in urine from patients with persistent UTI  
282 symptoms and negative cultures following antibiotic therapy has been criticized as being  
283 confounded by the presence of relic DNA (Lehmann et al., 2011). To investigate  
284 whether non-culturable, viable bacteria can still be present in urine after antibiotic  
285 treatment of UTI, we administered uropathogenic *E. coli* (UTI89) to mice and treated  
286 them with ciprofloxacin according to established protocols (Hung, 2009). One day after  
287 the completion of antibiotic treatment, 3 out of the 5 replicate groups had no bacterial  
288 growth on non-selective LB agar (**Figure 5**). However, after PMA treatment of these  
289 samples, PCR successfully amplified the *E. coli uidA* gene in 2 out of the 3 culture-  
290 negative groups, indicating the presence of viable, nonculturable bacteria. Based on our  
291 standard curve (**Figure 3**), these 2 groups contained 1 and  $6 \times 10^5$  cfu/ml *E. coli*.

292

## 293 **DISCUSSION**

294

295 Our findings indicate that a PMA-based urine PCR is an appropriate method to  
296 distinguish viable and non-viable *E. coli* in the urine for both *in vitro* and *in vivo*  
297 applications. We were able to eliminate the signal from soluble relic DNA and DNA from  
298 nonviable cells. By resuspending urine contents in PBS before PMA treatment we  
299 established an easy and reproducible method to eliminate soluble relic DNA while  
300 preserving *E. coli* cells. This approach yielded  $dC_T$  values similar to that of non-urine  
301 exposed *E. coli* resuspended in PBS and those reported in the literature (Taskin et al.,

2011). Thus, we demonstrate a novel method to utilize PMA in urine that will allow for PCR-based studies to selectively identify viable bacteria in urine.

Our preliminary experiments pointed to a matrix effect of murine urine that inhibited PMA crosslinking of DNA (Chamberlain et al., 2019). We initially focused on urea as a potential cause of this effect. Urea is a by-product of amino acid metabolism and one of the most abundant urine solutes. Mouse urine has a higher urea concentration compared to human urine, which led us to speculate that urea could be influencing PMA crosslinking function in mouse urine (Yang and Bankir, 2005). The similar  $dC_T$  of *E. coli* in urea vs. PBS suggested urea is not the substance in urine that inhibits PMA's crosslinking efficiency. Thus, the inhibitory effect of urine is likely due to a non-urea-related matrix effect. The simple steps of centrifuging bacteria-containing samples and resuspending them in buffer may eliminate any matrix effect of other biofluids and environmental samples of interest, enabling PMA-based PCR amplification of DNA from viable bacteria in other settings.

Identifying viable, but potentially unculturable bacteria may improve understanding of bacterial biology in patients with recurrent UTI. We identified non-culturable but viable *E. coli* in the urine of infected mice given ciprofloxacin. Non-culturable but viable bacteria in settings other than the urinary tract are a recognized phenomenon (Coutard et al., 2005; Oliver, 2005). However, the presence of such bacteria in urine is poorly characterized. It may be that these bacteria represent intracellular *E. coli* which have formed intracellular communities and become quiescent reservoirs of infection (Mulvey et al., 2001; Rosen et al., 2007). Our findings may explain why, despite patients having undergone susceptibility-guided antibiotic treatment and a subsequent negative test-of-cure by urine culture, some of these patients experience recurrent UTI.

Compared to urine culture, PMA-based urine PCR has the clinical advantages of a more rapid time to UTI diagnosis and broader organism detection. While enhanced quantitative urine culture has demonstrated greater sensitivity for uropathogen detection than conventional culture (Price et al., 2016), it is still time-intensive. In contrast, a uropathogen-specific PCR platform based on PMA could detect multiple viable organisms quickly.

This is a preliminary study using a new molecular method for identification of bacteria in urine. A potential limitation to our study is the use of PMA dye prior to PCR. Specifically, studies have shown that PMA results can be skewed by specific primers. However, the primers used in this study have been shown to be effective in multiple studies for *E. coli* without loss of viability data (Taskin et al., 2011; van Frankenhuyzen et al., 2013). Finally, it remains to be determined how this PMA-based PCR platform performs with human urine.

343  
344  
345  
346



347 **ACKNOWLEDGMENTS**

348 This work was supported by NIH-R01DK113504 (MH) and George Washington  
349 University Cancer Biology Training Program NIH-T32CA247756 (KI)

350 **CONTRIBUTION TO THE FIELD STATEMENT**

351  
352 Conventional PCR detection of bacteria in the urine cannot differentiate between viable  
353 and non-viable bacteria. Here, we describe a novel PCR-based method to selectively  
354 detect DNA from viable bacteria in urine. In mice given urinary tract infections, we  
355 demonstrate that viable bacteria still remain in urine after a complete course of  
356 antibiotics. This finding may account for recurrent UTI or persistent symptoms in some  
357 patients treated with antibiotics for UTI who have negative post-treatment urine cultures.  
358 Compared to conventional urine cultures, this PCR-based method may be superior in  
359 sensitivity for the diagnosis of UTI.

360  
361  
362  
363  
364  
365  
366  
367  
368  
369  
370  
371  
372  
373  
374  
375  
376  
377  
378  
379  
380  
381  
382  
383  
384  
385  
386  
387  
388  
389  
390

391  
392  
393  
394  
395  
396  
397  
398  
399  
400  
401  
402  
403  
404  
405  
406  
407  
408  
409  
410  
411  
412  
413  
414  
415  
416  
417  
418  
419  
420  
421  
422  
423  
424  
425  
426  
427  
428  
429  
430  
431  
432  
433  
434

## REFERENCES

- Ackerman, A. L., Anger, J. T., Khalique, M. U., Ackerman, J. E., Tang, J., Kim, J., et al. (2019). Optimization of DNA extraction from human urinary samples for mycobiome community profiling. *PLoS One* 14, e0210306. doi:10.1371/journal.pone.0210306.
- Bajic, P., Van Kuiken, M. E., Burge, B. K., Kirshenbaum, E. J., Joyce, C. J., Wolfe, A. J., et al. (2018). Male Bladder Microbiome Relates to Lower Urinary Tract Symptoms. *Eur. Urol. Focus*. doi:10.1016/j.euf.2018.08.001.
- Brauge, T., Midelet-Bourdin, G., and Soumet, C. (2019). Viability Detection of Foodborne Bacterial Pathogens in Food Environment by PMA-qPCR and by Microscopic Observation. *Methods Mol. Biol.* 1918, 117–128. doi:10.1007/978-1-4939-9000-9\_9.
- Brubaker, L., and Wolfe, A. J. (2015). The new world of the urinary microbiota in women. *Am. J. Obstet. Gynecol.* 213, 644–649. doi:10.1016/j.ajog.2015.05.032.
- Bučević Popović, V., Šitum, M., Chow, C.-E. T., Chan, L. S., Roje, B., and Terzić, J. (2018). The urinary microbiome associated with bladder cancer. *Sci. Rep.* 8, 12157. doi:10.1038/s41598-018-29054-w.
- Carini, P., Marsden, P. J., Leff, J. W., Morgan, E. E., Strickland, M. S., and Fierer, N. (2016). Relic DNA is abundant in soil and obscures estimates of soil microbial diversity. *Nat. Microbiol.* 2, 16242. doi:10.1038/nmicrobiol.2016.242.
- Cattani, F., Barth, V. C. J., Nasário, J. S. R., Ferreira, C. A. S., and Oliveira, S. D. (2016). Detection and quantification of viable *Bacillus cereus* group species in milk by propidium monoazide quantitative real-time PCR. *J. Dairy Sci.* 99, 2617–2624. doi:10.3168/jds.2015-10019.
- Chamberlain, C. A., Rubio, V. Y., and Garrett, T. J. (2019). Impact of matrix effects and ionization efficiency in non-quantitative untargeted metabolomics. *Metabolomics* 15, 135. doi:10.1007/s11306-019-1597-z.
- Coutard, F., Pommepuy, M., Loaec, S., and Hervio-Heath, D. (2005). mRNA detection by reverse transcription-PCR for monitoring viability and potential virulence in a pathogenic strain of *Vibrio parahaemolyticus* in viable but nonculturable state. *J. Appl. Microbiol.* 98, 951–961. doi:10.1111/j.1365-2672.2005.02534.x.
- Deshmukh, R., Bhand, S., and Roy, U. (2020). A novel method for rapid and sensitive detection of viable *Escherichia coli* cells using UV-induced PMA-coupled quantitative PCR. *Brazilian J. Microbiol. [publication Brazilian Soc. Microbiol.]* 51, 773–778. doi:10.1007/s42770-019-00161-8.
- Fittipaldi, M., Rodriguez, N. J. P., Codony, F., Adrados, B., Peñuela, G. A., and Morató, J. (2010). Discrimination of infectious bacteriophage T4 virus by propidium monoazide real-time PCR. *J. Virol. Methods* 168, 228–232. doi:10.1016/j.jviromet.2010.06.011.
- Fouts, D. E., Pieper, R., Szpakowski, S., Pohl, H., Knoblauch, S., Suh, M., et al. (2012). Integrated next-generation sequencing of 16S rDNA and metaproteomics differentiate the healthy urine microbiome from asymptomatic bacteriuria in neuropathic bladder associated with spinal cord injury. *J. Transl. Med.* 10, 1. doi:10.1186/1479-5876-10-174.
- Gobert, G., Cotillard, A., Fourmestraux, C., Pruvost, L., Miguët, J., and Boyer, M. (2018). Droplet digital PCR improves absolute quantification of viable lactic acid bacteria in faecal samples. *J. Microbiol. Methods* 148, 64–73. doi:10.1016/j.mimet.2018.03.004.

- 435 Guillard, T., Cambau, E., Chau, F., Massias, L., de Champs, C., and Fantin, B. (2013). Ciprofloxacin  
436 treatment failure in a murine model of pyelonephritis due to an AAC(6')-Ib-cr-producing  
437 *Escherichia coli* strain susceptible to ciprofloxacin in vitro. *Antimicrob. Agents Chemother.*  
438 57, 5830–5835. doi:10.1128/AAC.01489-13.
- 439 Hilt, E. E., McKinley, K., Pearce, M. M., Rosenfeld, A. B., Zilliox, M. J., Mueller, E. R., et al. (2014).  
440 Urine is not sterile: Use of enhanced urine culture techniques to detect resident bacterial  
441 flora in the adult female bladder. *J. Clin. Microbiol.* 52, 871–876. doi:10.1128/JCM.02876-  
442 13.
- 443 Hung, C. (2009). A murine model of urinary tract infection. *Nat. Protoc.* 4, 1230–1243.  
444 doi:10.1038/nprot.2009.116.A.
- 445 Lehmann, L. E., Hauser, S., Malinka, T., Klaschik, S., Weber, S. U., Schewe, J.-C., et al. (2011).  
446 Rapid qualitative urinary tract infection pathogen identification by SeptiFast real-time  
447 PCR. *PLoS One* 6, e17146. doi:10.1371/journal.pone.0017146.
- 448 Lennon, J. T., Muscarella, M. E., Placella, S. A., and Lehmkuhl, B. K. (2018). How, When, and  
449 Where Relic DNA Affects Microbial Diversity. *MBio* 9. doi:10.1128/mBio.00637-18.
- 450 Lewis, D. A., Brown, R., Williams, J., White, P., Jacobson, S. K., Marchesi, J. R., et al. (2013). The  
451 human urinary microbiome; bacterial DNA in voided urine of asymptomatic adults. *Front.*  
452 *Cell. Infect. Microbiol.* 3, 41. doi:10.3389/fcimb.2013.00041.
- 453 Lu, J., Zheng, H., Chu, P., Han, S., Yang, H., Wang, Z., et al. (2019). Direct detection from clinical  
454 sputum samples to differentiate live and dead *Mycobacterium Tuberculosis*. *J. Clin. Lab.*  
455 *Anal.* 33, e22716. doi:10.1002/jcla.22716.
- 456 Magistro, G., and Stief, C. G. (2019). The Urinary Tract Microbiome: The Answer to All Our Open  
457 Questions? *Eur. Urol. Focus* 5, 36–38. doi:10.1016/j.euf.2018.06.011.
- 458 Miller, L. G., Friedland, I., and Dwyer, J. P. (2019). Once-Daily Plazomicin for Complicated  
459 Urinary Tract Infections. 729–740. doi:10.1056/NEJMoa1801467.
- 460 Mulvey, M. A., Schilling, J. D., and Hultgren, S. J. (2001). Establishment of a persistent  
461 *Escherichia coli* reservoir during the acute phase of a bladder infection. *Infect. Immun.* 69,  
462 4572–4579. doi:10.1128/IAI.69.7.4572-4579.2001.
- 463 Nagler, M., Podmirseg, S. M., Mayr, M., Ascher-Jenull, J., and Insam, H. (2021). The masking  
464 effect of extracellular DNA and robustness of intracellular DNA in anaerobic digester NGS  
465 studies: A discriminatory study of the total DNA pool. *Mol. Ecol.* 30, 438–450.  
466 doi:10.1111/mec.15740.
- 467 Neugent, M. L., Hulyalkar, N. V., Nguyen, V. H., Zimmern, P. E., and De Nisco, N. J. (2020).  
468 Advances in Understanding the Human Urinary Microbiome and Its Potential Role in  
469 Urinary Tract Infection. *MBio* 11, e00218-20. doi:10.1128/mBio.00218-20.
- 470 Oliver, J. D. (2005). The viable but nonculturable state in bacteria. *J. Microbiol.* 43 Spec No, 93–  
471 100.
- 472 Perez-Carrasco, V., Soriano-Lerma, A., Soriano, M., Gutiérrez-Fernández, J., and Garcia-Salcedo,  
473 J. A. (2021). Urinary Microbiome: Yin and Yang of the Urinary Tract. *Front. Cell. Infect.*  
474 *Microbiol.* 11, 617002. doi:10.3389/fcimb.2021.617002.
- 475 Price, T. K., Dune, T., Hilt, E. E., Thomas-White, K. J., Kliethermes, S., Brincat, C., et al. (2016).  
476 The Clinical Urine Culture: Enhanced Techniques Improve Detection of Clinically Relevant  
477 Microorganisms. *J. Clin. Microbiol.* 54, 1216–1222. doi:10.1128/JCM.00044-16.
- 478 Price, T. K., Hilt, E. E., Dune, T. J., Mueller, E. R., Wolfe, A. J., and Brubaker, L. (2018). Urine

- 479 trouble: should we think differently about UTI? *Int. Urogynecol. J.* 29, 205–210.  
480 doi:10.1007/s00192-017-3528-8.
- 481 Raz, R., Chazan, B., Kennes, Y., Colodner, R., Rottensterich, E., Dan, M., et al. (2002). Empiric use  
482 of trimethoprim-sulfamethoxazole (TMP-SMX) in the treatment of women with  
483 uncomplicated urinary tract infections, in a geographical area with a high prevalence of  
484 TMP-SMX-resistant uropathogens. *Clin. Infect. Dis. an Off. Publ. Infect. Dis. Soc. Am.* 34,  
485 1165–1169. doi:10.1086/339812.
- 486 Ren, Q., Wei, F., Yuan, C., Zhu, C., Zhang, Q., Quan, J., et al. (2021). The effects of removing  
487 dead bacteria by propidium monoazide on the profile of salivary microbiome. *BMC Oral  
488 Health* 21, 460. doi:10.1186/s12903-021-01832-5.
- 489 Rosen, D. A., Hooton, T. M., Stamm, W. E., Humphrey, P. A., and Hultgren, S. J. (2007).  
490 Detection of intracellular bacterial communities in human urinary tract infection. *PLoS  
491 Med.* 4, e329. doi:10.1371/journal.pmed.0040329.
- 492 Siddiqui, H., Lagesen, K., Nederbragt, A. J., Jeansson, S. L., and Jakobsen, K. S. (2012).  
493 Alterations of microbiota in urine from women with interstitial cystitis. *BMC Microbiol.* 12,  
494 205. doi:10.1186/1471-2180-12-205.
- 495 Swamy, S., Kupelian, A. S., Khasriya, R., Dharmasena, D., Toteva, H., Dehpour, T., et al. (2019).  
496 Cross-over data supporting long-term antibiotic treatment in patients with painful lower  
497 urinary tract symptoms, pyuria and negative urinalysis. *Int. Urogynecol. J.* 30, 409–414.  
498 doi:10.1007/s00192-018-3846-5.
- 499 Taskin, B., Gozen, A. G., and Duran, M. (2011). Selective quantification of viable *Escherichia coli*  
500 bacteria in biosolids by quantitative PCR with propidium monoazide modification. *Appl.  
501 Environ. Microbiol.* 77, 4329–4335. doi:10.1128/AEM.02895-10.
- 502 Taylor, T. P., Janech, M. G., Slate, E. H., Lewis, E. C., Arthur, J. M., and Oates, J. C. (2012).  
503 Overcoming the effects of matrix interference in the measurement of urine protein  
504 analytes. *Biomark. Insights* 7, 1–8. doi:10.4137/BMI.S8703.
- 505 Thomas-White, K., Brady, M., Wolfe, A. J., and Mueller, E. R. (2016). The Bladder Is Not Sterile:  
506 History and Current Discoveries on the Urinary Microbiome. *Curr. Bladder Dysfunct. Rep.*  
507 11, 18–24. doi:10.1007/s11884-016-0345-8.
- 508 van Frankenhuyzen, J. K., Trevors, J. T., Flemming, C. A., Lee, H., and Habash, M. B. (2013).  
509 Optimization, validation, and application of a real-time PCR protocol for quantification of  
510 viable bacterial cells in municipal sewage sludge and biosolids using reporter genes and  
511 *Escherichia coli*. *J. Ind. Microbiol. Biotechnol.* 40, 1251–1261. doi:10.1007/s10295-013-  
512 1319-x.
- 513 Wei, H., Fan, Y., and Gao, Y. Q. (2010). Effects of urea, tetramethyl urea, and trimethylamine N-  
514 oxide on aqueous solution structure and solvation of protein backbones: a molecular  
515 dynamics simulation study. *J. Phys. Chem. B* 114, 557–568. doi:10.1021/jp9084926.
- 516 Whiteside, S. A., Razvi, H., Dave, S., Reid, G., and Burton, J. P. (2015). The microbiome of the  
517 urinary tract—a role beyond infection. *Nat. Rev. Urol.* 12, 81–90.  
518 doi:10.1038/nrurol.2014.361.
- 519 Wolfe, A. J., Toh, E., Shibata, N., Rong, R., Kenton, K., Fitzgerald, M., et al. (2012). Evidence of  
520 uncultivated bacteria in the adult female bladder. *J. Clin. Microbiol.* 50, 1376–1383.  
521 doi:10.1128/JCM.05852-11.
- 522 Wunderink, R. G., Giamarellou-Bourboulis, E. J., Rahav, G., Mathers, A. J., Bassetti, M., Vazquez,

523 J., et al. (2018). Effect and Safety of Meropenem-Vaborbactam versus Best-Available  
524 Therapy in Patients with Carbapenem-Resistant Enterobacteriaceae Infections: The  
525 TANGO II Randomized Clinical Trial. *Infect. Dis. Ther.* 7, 439–455. doi:10.1007/s40121-018-  
526 0214-1.

527 Yang, B., and Bankir, L. (2005). Urea and urine concentrating ability: new insights from studies  
528 in mice. *Am. J. Physiol. Renal Physiol.* 288, F881-96. doi:10.1152/ajprenal.00367.2004.

529  
530  
531  
532

533

534

535

536

537

538

539

540

541

542

543

544

545

546

547

548

549

550

551

552 **FIGURES**

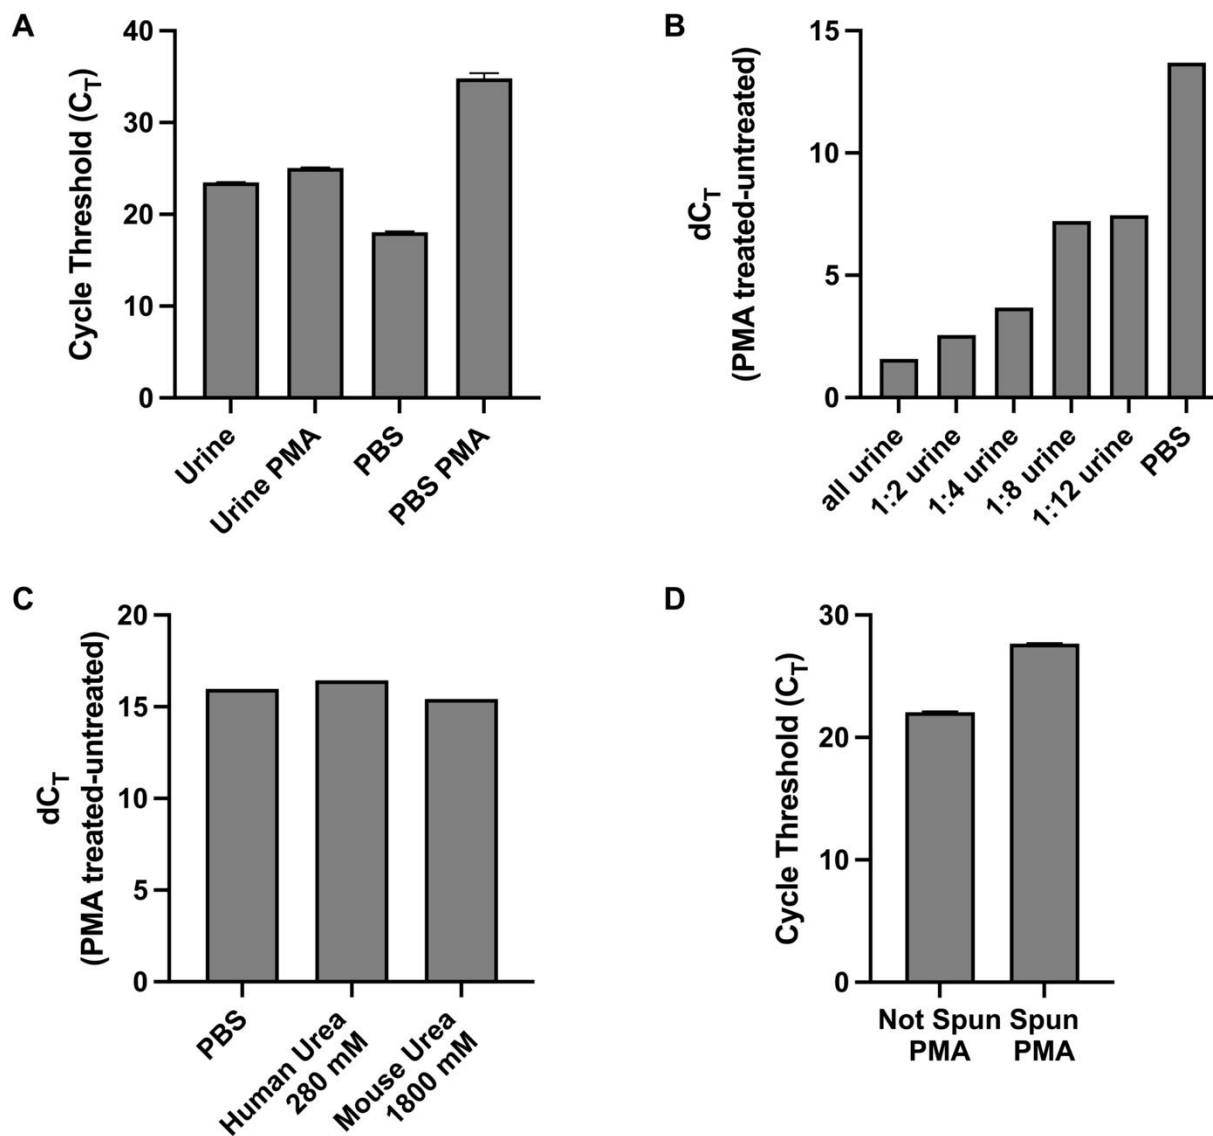

553

554 **Figure 1 (A-D): The matrix effect of urine on PMA crosslinking of DNA is not urea-**  
555 **based and is eliminated by centrifugation and resuspension in PBS.** A)  $C_T$  values  
556 of PMA-treated and untreated samples of non-viable bacteria resuspended in mouse  
557 urine or PBS. B) The difference in  $C_T$  ( $dC_T$ ) values of nonviable bacteria resuspended in  
558 various dilutions of urine or PBS. C)  $C_T$  values of non-viable bacteria treated with PMA  
559 in PBS or urea concentrations corresponding to human and mouse urine. D)  $C_T$  values  
560 of non-viable bacteria in urine with or without resuspending the contents in PBS before  
561 PMA treatment. Data shown is representative of three replicate experiments.

562

563

564

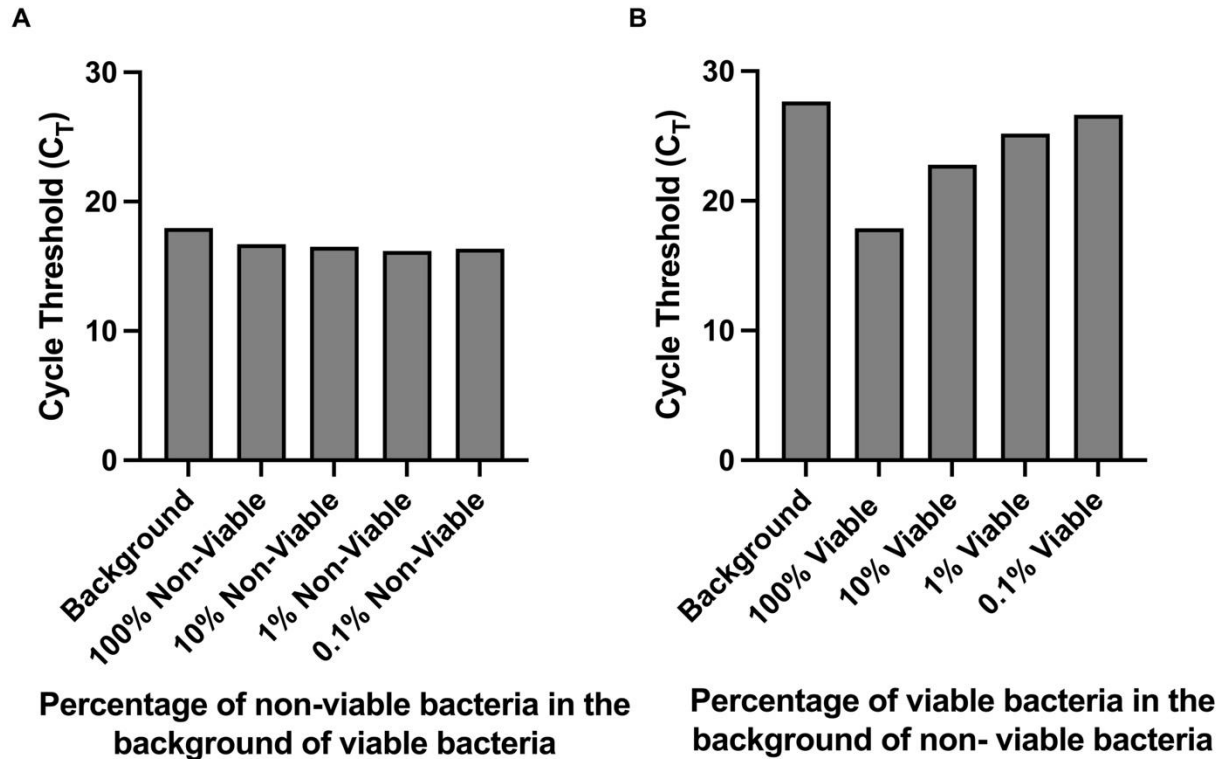

565  
566  
567  
568  
569  
570  
571  
572  
573  
574  
575  
576  
577  
578  
579  
580  
581  
582  
583  
584  
585  
586  
587

**Figure 2 (A,B): PMA crosslinking of DNA is most efficient when most of the bacteria is non-viable.** Bacterial samples were centrifuged and resuspended in PBS before PMA treatment. A)  $C_T$  values of samples with a fixed amount of viable bacteria and titrated amounts of nonviable bacteria. B)  $C_T$  values of samples with a fixed amount of non-viable bacteria and titrated amounts of viable bacteria.

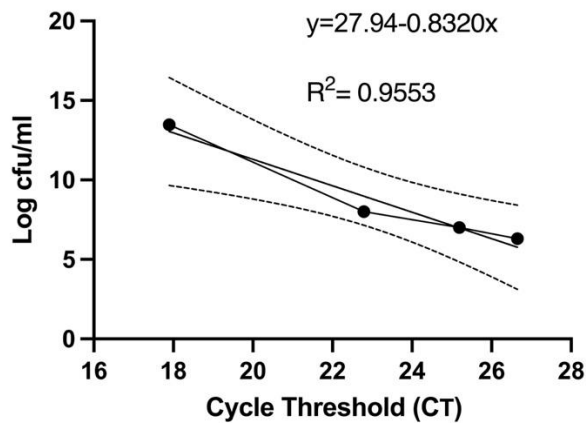

588  
589  
590  
591  
592  
593  
594  
595  
596  
597  
598

**Figure 3: Colony forming units and PMA-based viability PCR cycle threshold number has a strong negative correlation.** Before PMA treatment, an aliquot of bacterial samples was serially diluted, plated on LB agar plates, and cfu were counted after 24 hours. cfu per ml were plotted against the respective  $C_T$  values. The linear regression and 95% confidence interval band is shown. All experiments were repeated 3 times.

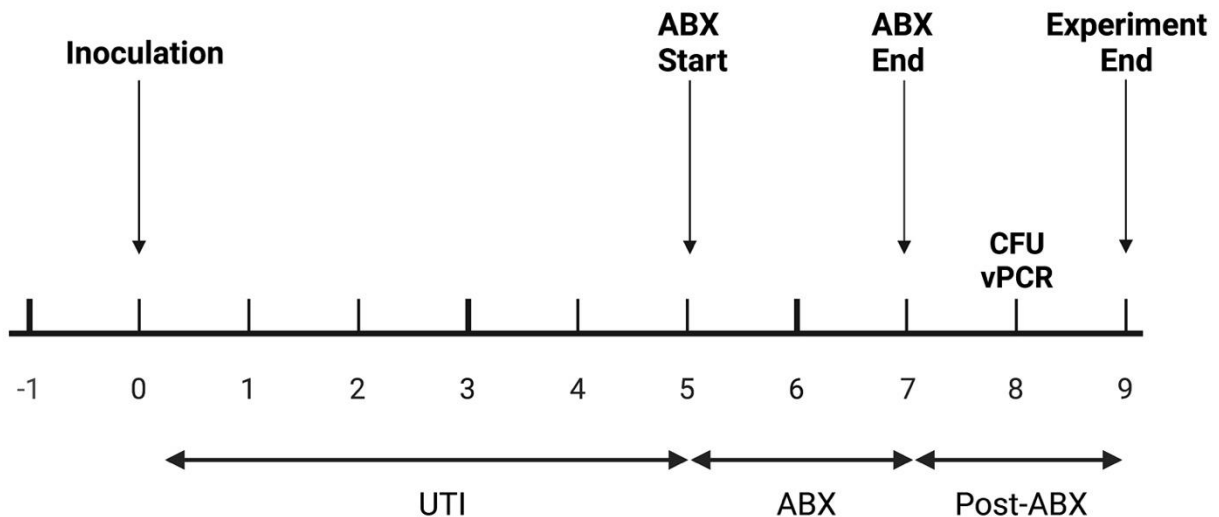

599  
600  
601  
602  
603  
604  
605  
606

**Figure 4: *In vivo* experimental plan.** Mice were inoculated with UTI89 via transurethral catheterization on day 0 and given ciprofloxacin (“ABX”) twice daily on days 5, 6, and 7 post-infection. On day 8, one day after the completion of antibiotics, urine was collected to measure cfu/mL and to perform PMA-based viability PCR (“vPCR”).



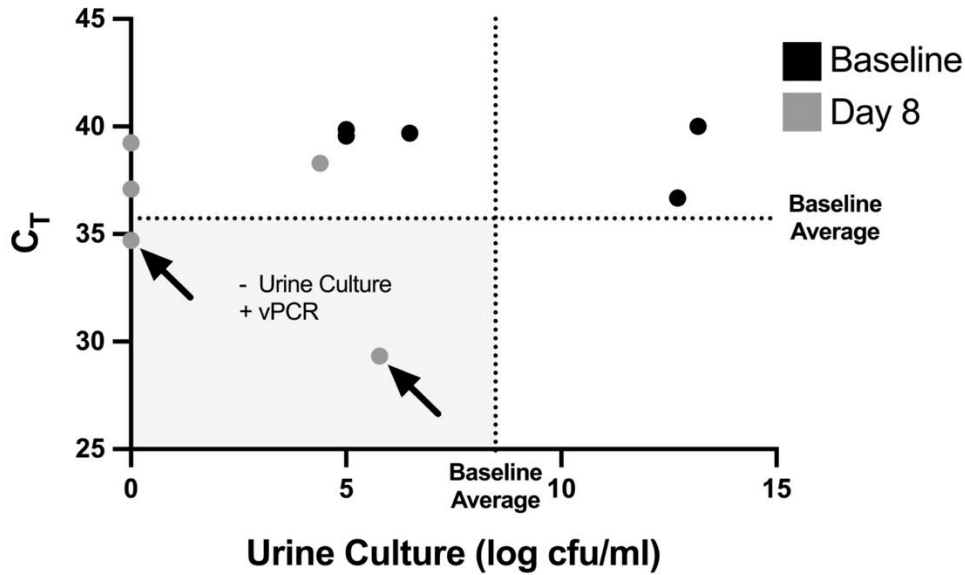

607

608

609 **Figure 5: Non-culturable, live bacteria detected in mouse urine by PMA-based**

610 **PCR after antibiotic treatment.** Mice were given UTIs on day 0 and were administered

611 ciprofloxacin starting on day 5 and ending after day 7 (see Figure 4). Graph depicts Ct

612 values and log transformed urine cfu/mL values at baseline before inoculation (black

613 dots), and at day 8 after antibiotic treatment (grey dots). Each dot represents a pooled

614 cohort of 2-3 mice. The average Ct and log cfu/ml of the baseline samples are

615 indicated by the dotted lines. The greyed quadrant (Q3) represents values that are

616 considered as having a negative urine culture and positive PMA-based viability PCR

617 (“vPCR”). Data shown is pooled from two set of experiments.

617
